# Supplementary material for: Improving Upconversion Photoluminescence of GdAlO3:Er3+, Yb3+ Phosphors via Ga3+, Lu3+ Doping
Source: Hindawi journal article supplement (doi:10.1155/2019/4814793), 2019-07-01
Supplement: f1 [file 4814793.f1.zip]

Archive with 2 entries (2 files):
- 4814793_SupplDesc.docx
- mat.4814793.v2.pdf
