# Supplementary material for: Improving Upconversion Photoluminescence of GdAlO3:Er3+, Yb3+ Phosphors via Ga3+, Lu3+ Doping
Source: Hindawi journal article supplement (doi:10.1155/2019/4814793), 2019-07-01
Supplement: f1 [file 4814793.f1.zip › 4814793_SupplDesc.docx]

All of the GdAlO3:Er3+,Yb3+ phosphors that have Al3+ substituted by Ga3+ have three main emission bands with maxima at 524 nm (green), 546 nm (green), 659nm (red) excited by 980 nm radiation. The green emission peaks are assigned to 2H11/2 → 4I15/2 and 4S3/2 → 4I15/2 transitions of Er3+, and the red emission peak is ascribed to the 4F9/2 →4I15/2 transition of Er3.Moreover, the position of the emission peak did not shift significantly with the substitution of Ga3+. Clearly, a marked improvement in the emission spectra at 546nm is observed with Ga3+ doping.
