# Supplementary material for: Improving Upconversion Photoluminescence of GdAlO3:Er3+, Yb3+ Phosphors via Ga3+, Lu3+ Doping
Source: Hindawi journal article supplement (doi:10.1155/2019/4814793), 2019-07-01

### Graphic Abstract:

All of the  $\text{GdAlO}_3:\text{Er}^{3+},\text{Yb}^{3+}$  phosphors that have  $\text{Al}^{3+}$  substituted by  $\text{Ga}^{3+}$  have three main emission bands with maxima at 524 nm (green), 546 nm (green), 659nm (red) excited by 980 nm radiation. The green emission peaks are assigned to  $^2\text{H}_{11/2} \rightarrow ^4\text{I}_{15/2}$  and  $^4\text{S}_{3/2} \rightarrow ^4\text{I}_{15/2}$  transitions of  $\text{Er}^{3+}$ , and the red emission peak is ascribed to the  $^4\text{F}_{9/2} \rightarrow ^4\text{I}_{15/2}$  transition of  $\text{Er}^{3+}$ . Moreover, the position of the emission peak did not shift significantly with the substitution of  $\text{Ga}^{3+}$ . Clearly, a marked improvement in the emission spectra at 546nm is observed with  $\text{Ga}^{3+}$  doping.

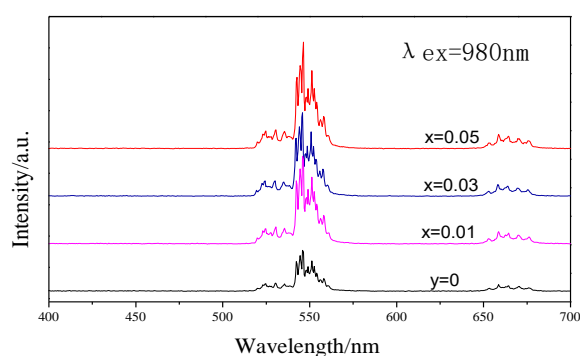

Supplement: f1 [file 4814793.f1.zip › mat.4814793.v2.pdf]
